# Supplementary material for: Fault zone architecture of a large plate-bounding strike-slip fault: a case study from the Alpine Fault, New Zealand
Source: Copernicus journal article supplement (doi:10.5194/se-2019-109), 2019-06-17
Supplement: Supplementary file 1 [file Table_S1.pdf › supplement/Table_S1.pdf]

**Table S1:** Data used for isocon analysis (see Figure 9) of structural units of the outcrops investigated in this study and derived mass gains. Data for structural units (hanging-wall; PSZ; footwall) are averages calculated from data presented in Table 5.

| location                          | unit         | MnO  | P <sub>2</sub> O <sub>5</sub> | TiO <sub>2</sub> | Na <sub>2</sub> O | K <sub>2</sub> O | CaO   | MgO   | Fe <sub>2</sub> O <sub>3</sub> <sup>a</sup> | Al <sub>2</sub> O <sub>3</sub> | SiO <sub>2</sub> | LOI   | mass gain [%] |
|-----------------------------------|--------------|------|-------------------------------|------------------|-------------------|------------------|-------|-------|---------------------------------------------|--------------------------------|------------------|-------|---------------|
| DFDP-2B <sup>b</sup>              | host rock    | 0.05 | 0.13                          | 0.48             | 3.06              | 2.03             | 1.54  | 1.34  | 3.60                                        | 13.05                          | 71.80            | 2.63  |               |
| Brook Street Terrane <sup>c</sup> | host rock    | 0.18 | 0.13                          | 0.84             | 2.39              | 0.59             | 11.16 | 7.67  | 10.37                                       | 15.14                          | 47.80            | 3.74  |               |
| Havelock Creek                    | PSZ          | 0.13 | 0.20                          | 0.81             | 1.77              | 1.39             | 7.85  | 4.20  | 6.49                                        | 13.60                          | 51.70            | 11.49 | 35.12         |
| Gaunt Creek                       | PSZ          | 0.13 | 0.19                          | 0.76             | 1.94              | 3.27             | 6.78  | 3.64  | 6.66                                        | 13.43                          | 51.40            | 11.38 | 35.85         |
|                                   | footwall     | 0.11 | 0.21                          | 0.79             | 2.10              | 2.94             | 5.22  | 3.67  | 6.05                                        | 13.92                          | 55.35            | 9.28  | 26.87         |
| DFDP-1A                           | hanging-wall | 0.09 | 0.16                          | 0.63             | 1.18              | 3.50             | 4.49  | 3.07  | 4.75                                        | 13.31                          | 55.51            | 13.02 | 26.71         |
|                                   | PSZ          | 0.06 | 0.18                          | 0.56             | 1.29              | 3.80             | 2.03  | 2.12  | 4.00                                        | 13.25                          | 62.62            | 9.71  | 13.47         |
| Waikukupa Thrust                  | hanging-wall | 0.12 | 0.10                          | 0.67             | 3.52              | 0.42             | 4.16  | 3.84  | 6.29                                        | 13.30                          | 57.65            | 9.53  | 22.34         |
|                                   | PSZ          | 0.21 | 0.14                          | 0.65             | 1.12              | 1.95             | 17.53 | 2.70  | 5.67                                        | 11.41                          | 44.47            | 13.74 | 56.08         |
|                                   | footwall     | 0.11 | 0.15                          | 0.81             | 3.03              | 1.82             | 2.47  | 2.74  | 6.12                                        | 14.75                          | 64.98            | 2.74  | 9.28          |
| Martyr River                      | hanging-wall | 0.11 | 0.18                          | 0.69             | 2.27              | 1.80             | 8.74  | 4.50  | 6.11                                        | 13.45                          | 52.67            | 8.96  | -4.44         |
|                                   | PSZ          | 0.10 | 0.14                          | 0.56             | 2.09              | 1.55             | 3.50  | 10.59 | 5.99                                        | 11.07                          | 56.61            | 7.34  | -8.54         |

<sup>a</sup> Fe<sub>2</sub>O<sub>3</sub> is total Fe content.

<sup>b</sup> Alpine Schist data is average from DFDP-2B drill cutting samples ICDP5052EXGY601, ICDP5052EXOY601 and ICDP5052EXLY601 presented in Table 4 of Toy et al. (2017).

<sup>c</sup> Values presented are averages derived from Table 1 in Spandler et al. (2005) and exclude data from Bluff Complex and Takitimu Mountains.
