# Supplementary material for: Fault zone architecture of a large plate-bounding strike-slip fault: a case study from the Alpine Fault, New Zealand
Source: Copernicus journal article supplement (doi:10.5194/se-2019-109), 2019-06-17
Supplement: Supplementary file 2 [file Table_S2.pdf › supplement/Table_S2.pdf]

**Table S2:** Enrichment (positive values) or depletion (negative values) [%] of individual elements with regard to fault rock units at locations studied. Data are averages calculated from data presented in Table 6.

| location         | unit         | MnO    | P <sub>2</sub> O <sub>5</sub> | TiO <sub>2</sub> | Na <sub>2</sub> O | K <sub>2</sub> O | CaO     | MgO    | Fe <sub>2</sub> O <sub>3</sub> <sup>a</sup> | Al <sub>2</sub> O <sub>3</sub> | SiO <sub>2</sub> | LOI    | mass gain |
|------------------|--------------|--------|-------------------------------|------------------|-------------------|------------------|---------|--------|---------------------------------------------|--------------------------------|------------------|--------|-----------|
| Havelock Creek   | PSZ          | 251.30 | 117.61                        | 126.88           | -21.93            | -7.63            | 587.26  | 324.56 | 143.81                                      | 40.78                          | -2.71            | 489.55 | 35.12     |
| Gaunt Creek      | PSZ          | 258.65 | 101.63                        | 115.38           | -13.97            | 118.48           | 496.81  | 269.95 | 151.56                                      | 39.77                          | -2.75            | 487.03 | 35.85     |
|                  | footwall     | 173.98 | 106.90                        | 109.15           | -13.22            | 83.23            | 328.82  | 248.58 | 113.60                                      | 35.35                          | -2.21            | 347.52 | 26.90     |
| DFDP-1A          | hanging-wall | 135.35 | 67.87                         | 69.39            | -51.84            | 119.14           | 307.65  | 203.03 | 71.05                                       | 29.55                          | -2.13            | 566.55 | 28.69     |
|                  | PSZ          | 31.62  | 60.35                         | 33.33            | -52.22            | 112.06           | 49.25   | 79.97  | 26.19                                       | 15.18                          | -1.04            | 318.20 | 13.47     |
| Waikukupa Thrust | hanging-wall | 196.83 | -3.82                         | 70.73            | 40.33             | -74.86           | 230.73  | 250.43 | 113.52                                      | 24.63                          | -1.78            | 347.40 | 22.41     |
|                  | PSZ          | 588.76 | 77.53                         | 110.50           | -44.00            | 50.08            | 1796.74 | 216.16 | 147.09                                      | 36.57                          | -3.42            | 719.41 | 58.58     |
|                  | footwall     | 146.97 | 32.00                         | 83.50            | 8.09              | -2.19            | 74.89   | 124.01 | 85.94                                       | 23.48                          | -1.11            | 13.84  | 9.28      |
| Martyr River     | hanging-wall | -43.42 | 26.05                         | -21.40           | -9.39             | 189.57           | -25.18  | -43.95 | -43.67                                      | -15.12                         | 5.29             | 128.73 | -4.44     |
|                  | PSZ          | -49.46 | -1.42                         | -39.56           | -20.16            | 138.65           | -71.32  | 26.24  | -47.15                                      | -33.13                         | 8.31             | 79.31  | -8.54     |

<sup>a</sup> Fe<sub>2</sub>O<sub>3</sub> is total Fe content.
