# Supplementary material for: Fault zone architecture of a large plate-bounding strike-slip fault: a case study from the Alpine Fault, New Zealand
Source: Copernicus journal article supplement (doi:10.5194/se-2019-109), 2019-06-17
Supplement: Supplementary file [file se-2019-109-AC2-supplement.pdf]

**Referee Comment (RC) 2**

This comment is a post scriptum to RC 1 by Christoph Schrank. It provides a reference (Sagy and Lyakhovsky, 2019) we happily deployed to reply to RC 1.

**References**

Sagy, A. and Lyakhovsky, V. (2019): Stress Patterns and Failure Around Rough Interlocked Fault Surface. Journal of Geophysical Research Solid Earth 124, 7,138 – 7,154.
